# Supplementary material
Source: MDPI journal article supplement (https://www.mdpi.com/2075-4442/11/12/524)

# Preparation and Tribological Behavior of Nitrogen-Doped Willow Catkins/MoS<sub>2</sub> Nanocomposites as Lubricant Additives in Liquid Paraffin

Yaping Xing <sup>1</sup>, Ebo Liu <sup>1</sup>, Bailin Ren <sup>1</sup>, Lisha Liu <sup>1</sup>, Zhiguo Liu <sup>1</sup>, Bocheng Zhu <sup>1</sup>, Xiaotian Wang <sup>1</sup>, Zhengfeng Jia <sup>1,\*</sup>, Weifang Han <sup>1,\*</sup> and Yungang Bai <sup>2</sup>

<sup>1</sup> School of Materials Science and Engineering, Liaocheng University, Liaocheng 252059, China

<sup>2</sup> Shandong Qichanxintu Composite Material Co., Ltd., Liaocheng 252800, China; bai9521@hotmail.com

\* Correspondence: jiazhfeng@lccu.edu.cn (Z.J.); hanweifang@lccu.edu.cn (W.H.)

|                                                                 | Molybdate dehydrate (g) | Thioacetamide (g) | willow catkins (ml) |
|-----------------------------------------------------------------|-------------------------|-------------------|---------------------|
| WC <sub>3</sub> M <sub>1</sub> S <sub>1</sub>                   | 1                       | 1                 | 30                  |
| WC <sub>0</sub> M <sub>2</sub> S <sub>1</sub>                   | 2                       | 1                 | /                   |
| WC <sub>2</sub> M <sub>2</sub> S <sub>1</sub>                   | 2                       | 1                 | 20                  |
| M <sub>1</sub> S <sub>1</sub>                                   | 1                       | 1                 | /                   |
| M <sub>1</sub> S <sub>2</sub>                                   | 1                       | 2                 | /                   |
| M <sub>2</sub> S <sub>1</sub>                                   | 2                       | 1                 | /                   |
| WC <sub>3</sub> M <sub>2</sub> S <sub>1</sub>                   | 2                       | 1                 | 30                  |
| WC <sub>4</sub> M <sub>2</sub> S <sub>1</sub>                   | 2                       | 1                 | 40                  |
| Table S1. The catalogue and component content of the composites |                         |                   |                     |

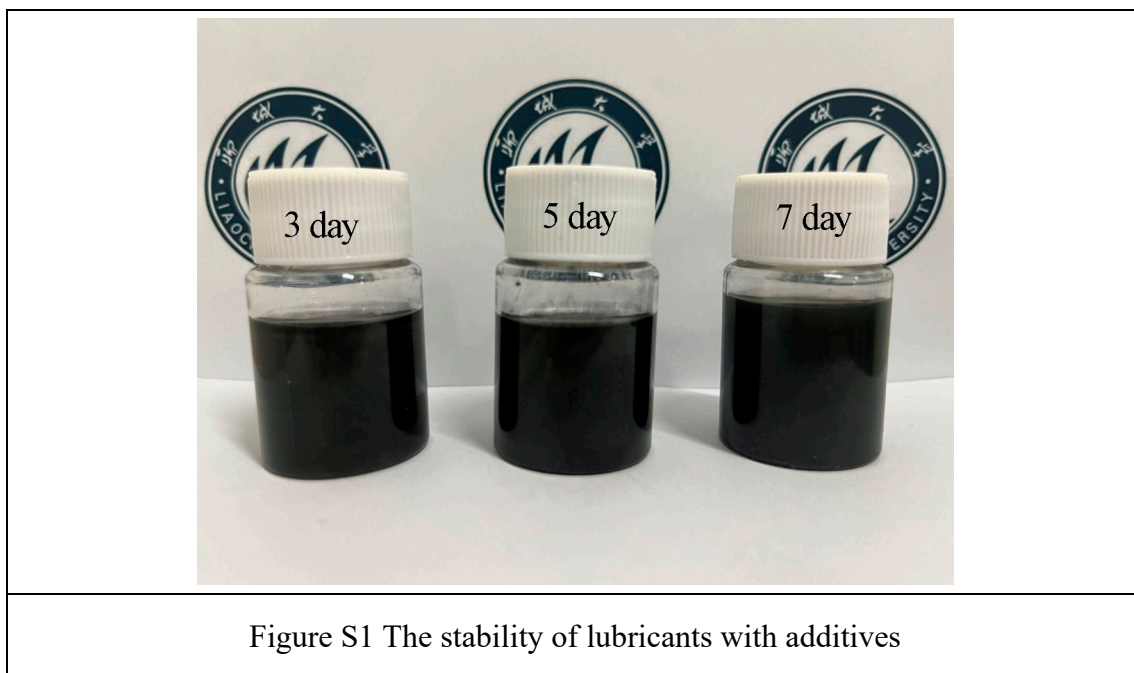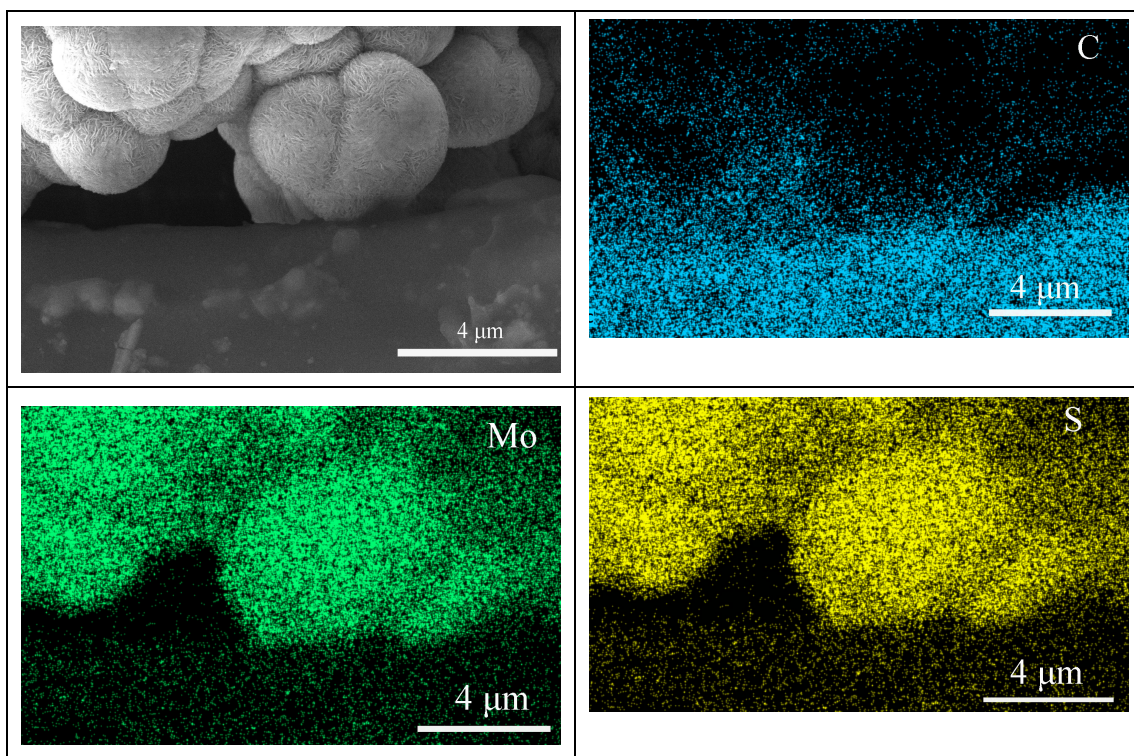

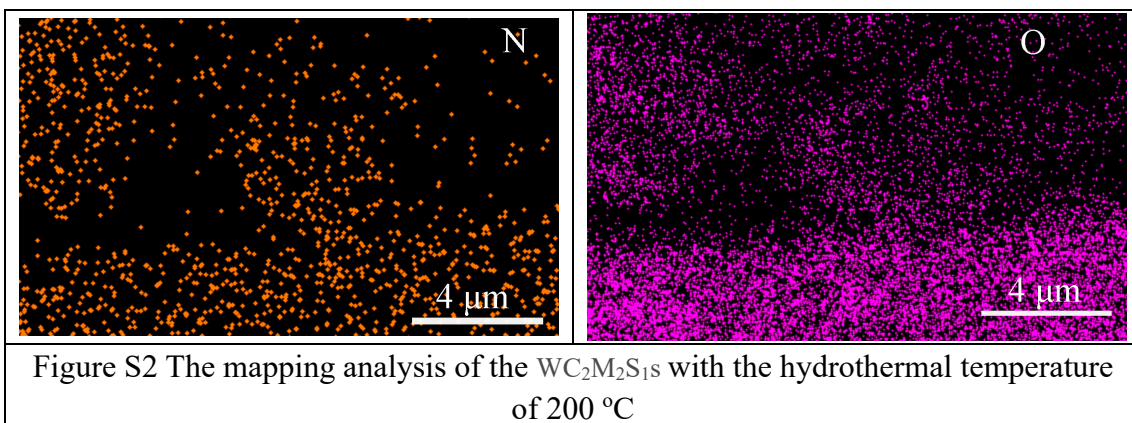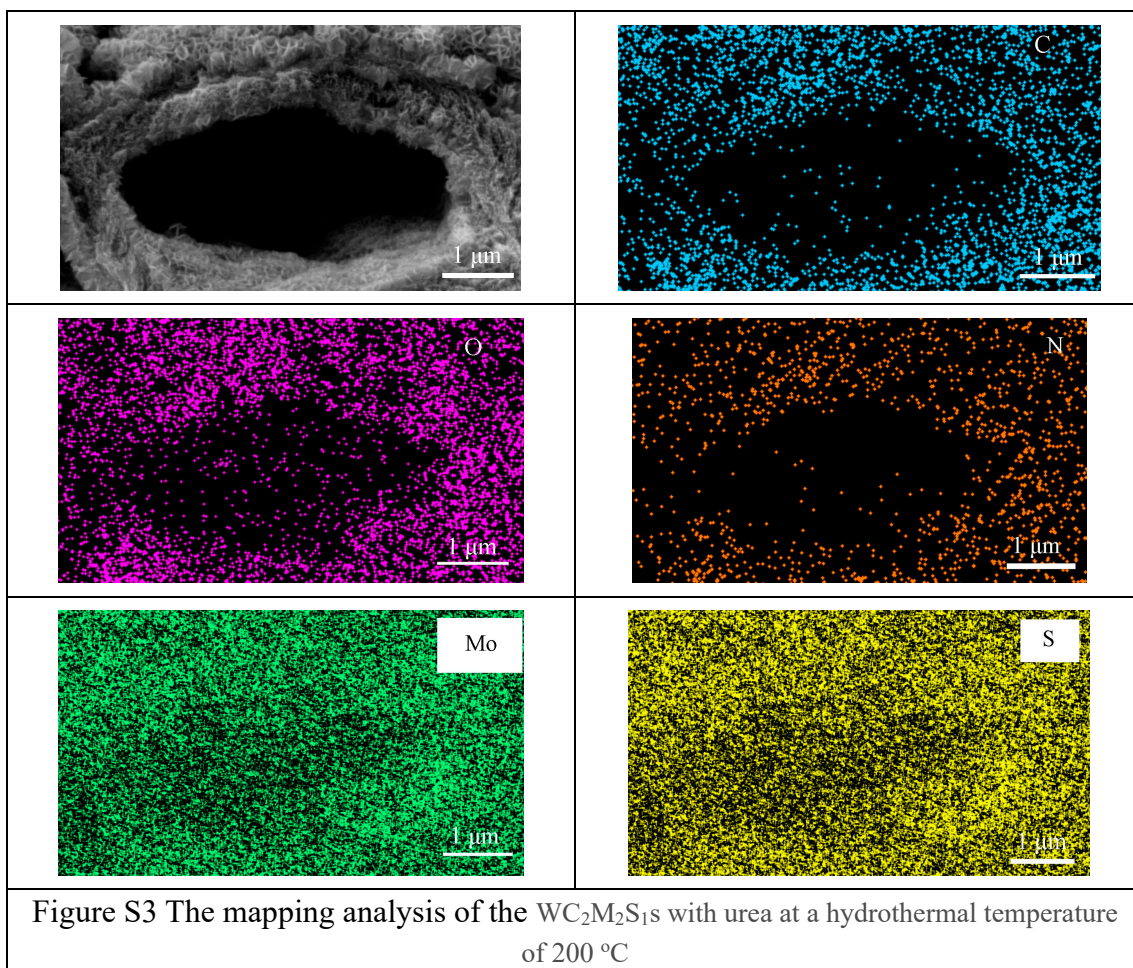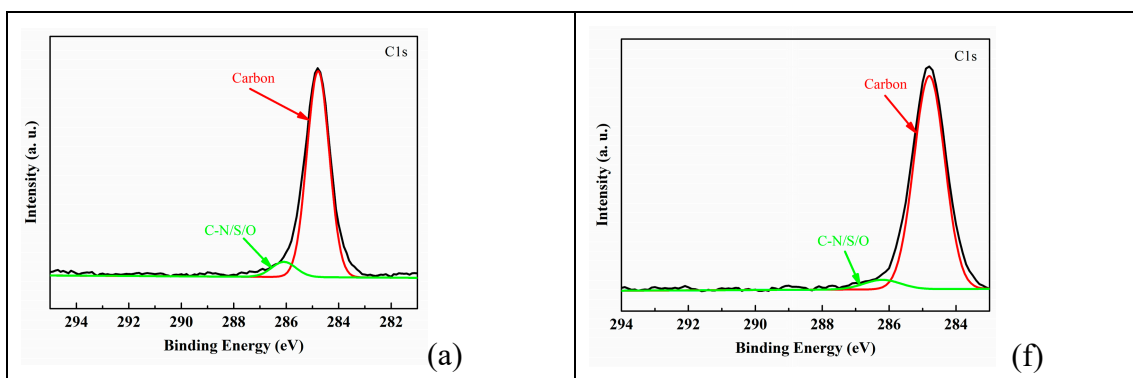

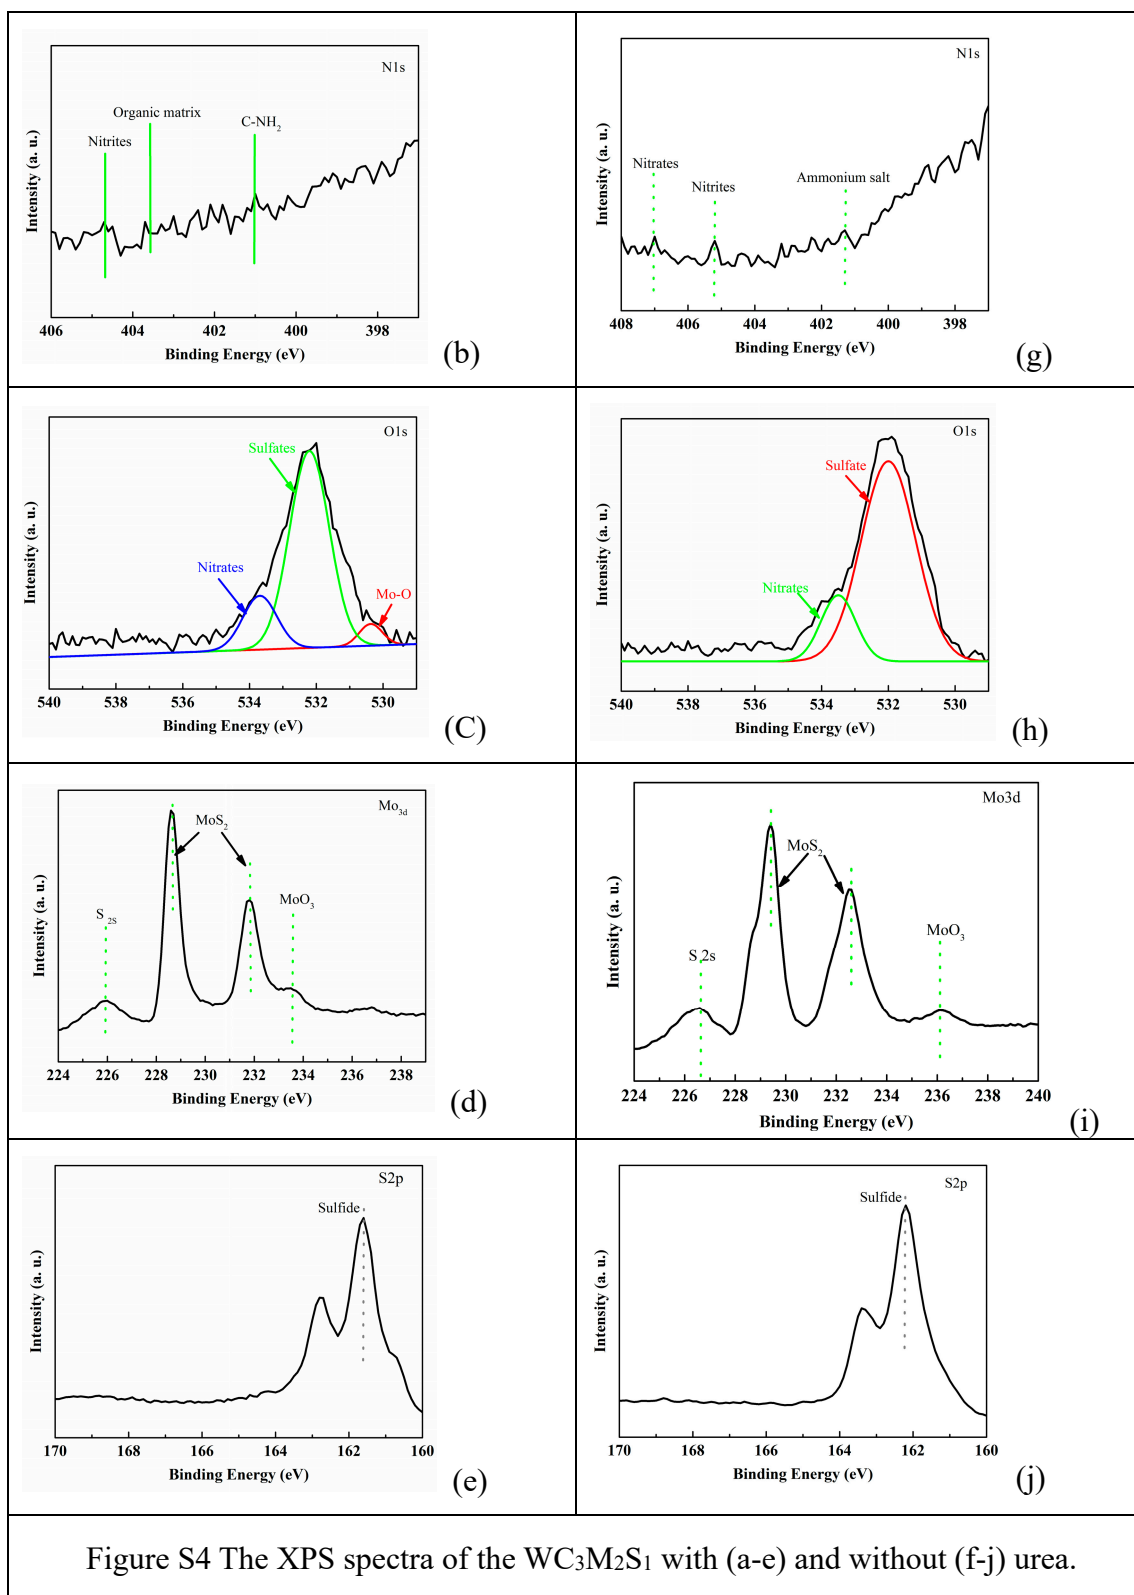

Figure S4 The XPS spectra of the  $WC_3M_2S_1$  with (a-e) and without (f-j) urea.



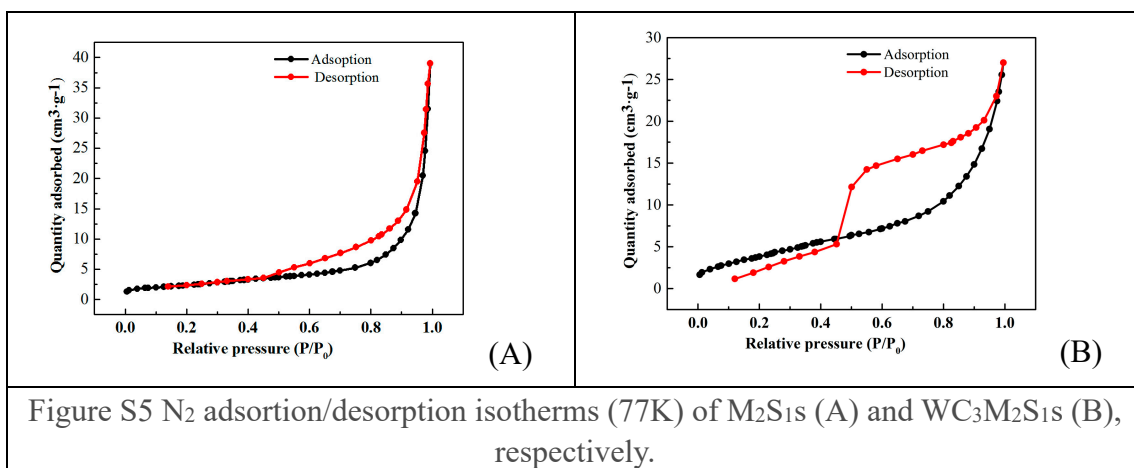

Supplement: s1 [file s1]
